# Supplementary material for: In situ growth of Bi-MOF on cotton fabrics via ultrasonic synthesis strategy for recyclable photocatalytic textiles
Source: Royal Society of Chemistry journal article supplement (doi:10.1039/d4ra00493k), 2024-01-01
Supplement: d4ra00493k1.pdf [file d4ra00493k1.pdf]

## Supplementary Information

### **In-situ growth of Bi-MOFs on cotton fabrics via ultrasonic synthesis strategy for recyclable photocatalytic textiles**

Hengjie Qin<sup>1</sup>, Ying Lv<sup>2</sup>, Koji Nakane\*<sup>1</sup>

*1 Frontier Fiber Technology and Science, University of Fukui, Bunkyo 3-9-1, Fukui, 910-8507, Japan. Email: nakane@matse.u-fukui.ac.jp*

*2 New Energy College, Xi'an Shiyou University, No.18 East Section 2nd Dianzi Road, Xi'an, 710065, China*

To evaluate the loading of MOF on the CCF under different synthesis conditions, three different methods were used.

By weighing data:

$$\text{loading mass (\%)} = \frac{M_{\text{MOF@CCF}} - M_{\text{CCF}}}{M_{\text{CCF}}} \times 100\% \#(S1)$$

Where  $M_{\text{MOF@CCF}}$  (g) is the dry weight of the sample after MOF loading and  $M_{\text{CCF}}$  (g) is the dry weight of the CCF substrate. The synthesis experiments were repeated three times for each sample and the average values were calculated.

By BET data<sup>1</sup>:

$$\text{loading mass (\%)} = \frac{SA_{\text{MOF@CCF}} - SA_{\text{CCF}}}{SA_{\text{MOF}} - SA_{\text{CCF}}} \times 100\% \#(S2)$$

Where  $SA_{\text{MOF@CCF}}$  (m<sup>2</sup>/g),  $SA_{\text{CCF}}$  (m<sup>2</sup>/g) and  $SA_{\text{MOF}}$  (m<sup>2</sup>/g) are the surface area of MOF@CCF composites, bare CCF and MOF powder, respectively.

By TG data<sup>2</sup>:

$$\text{loading mass (\%)} = \frac{\text{wt}\%_{\text{MOF}, 275^\circ\text{C}} / \text{wt}\%_{\text{MOF}, 600^\circ\text{C}}}{\text{wt}\%_{\text{MOF@CCF}, 275^\circ\text{C}} / \text{wt}\%_{\text{MOF@CCF}, 600^\circ\text{C}}} \#(S3)$$

Where  $\text{wt}\%_{\text{MOF}, 275^\circ\text{C}}$ ,  $\text{wt}\%_{\text{MOF}, 600^\circ\text{C}}$  and  $\text{wt}\%_{\text{MOF@CCF}, 275^\circ\text{C}}$ ,  $\text{wt}\%_{\text{MOF@CCF}, 600^\circ\text{C}}$  are the weight percent for the MOF powder and MOF@CCF composites of the TG curve, respectively. In this equation, it is assumed that the absorbed solvent in the sample is removed at 275 °C and that the MOF is completely transformed to Bi<sub>2</sub>O<sub>3</sub> at 600 °C.

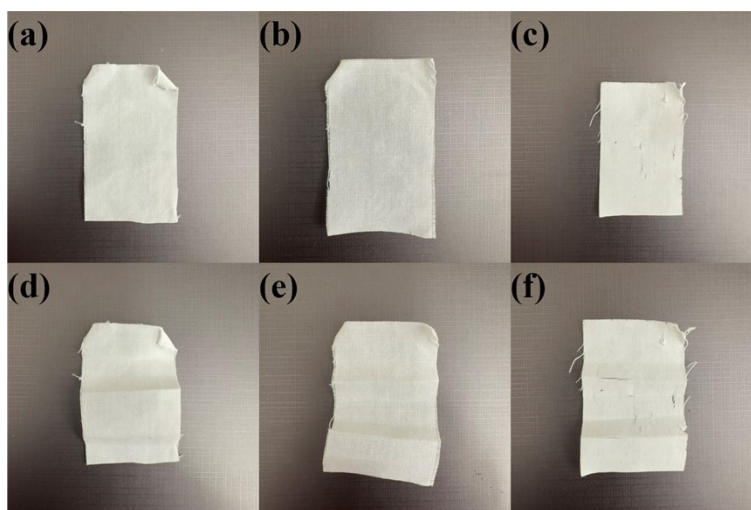

**Fig. S1** Images of samples after CAU-17 loading. (a, d) CAU-17\_0@CCF, (b, e) CAU-17\_200@CCF, (c, f) CAU-17\_ST@CCF. (d-f) Folding the sample 2 times and maintaining the same pressure for 1 min.

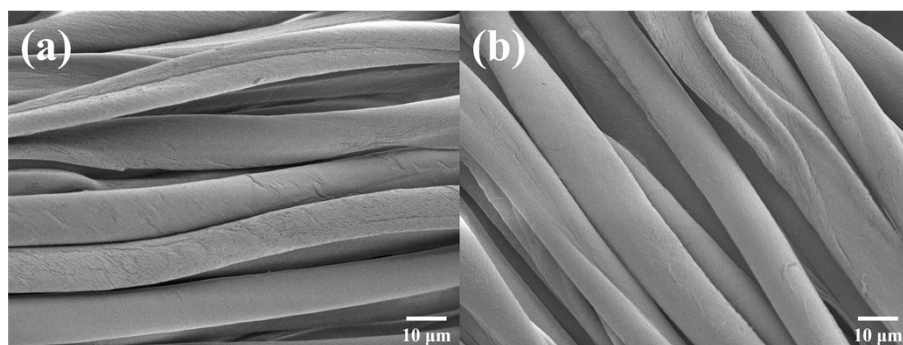

**Fig. S2** SEM of (a) cotton fabric and (b) carboxymethylated cotton fabric.

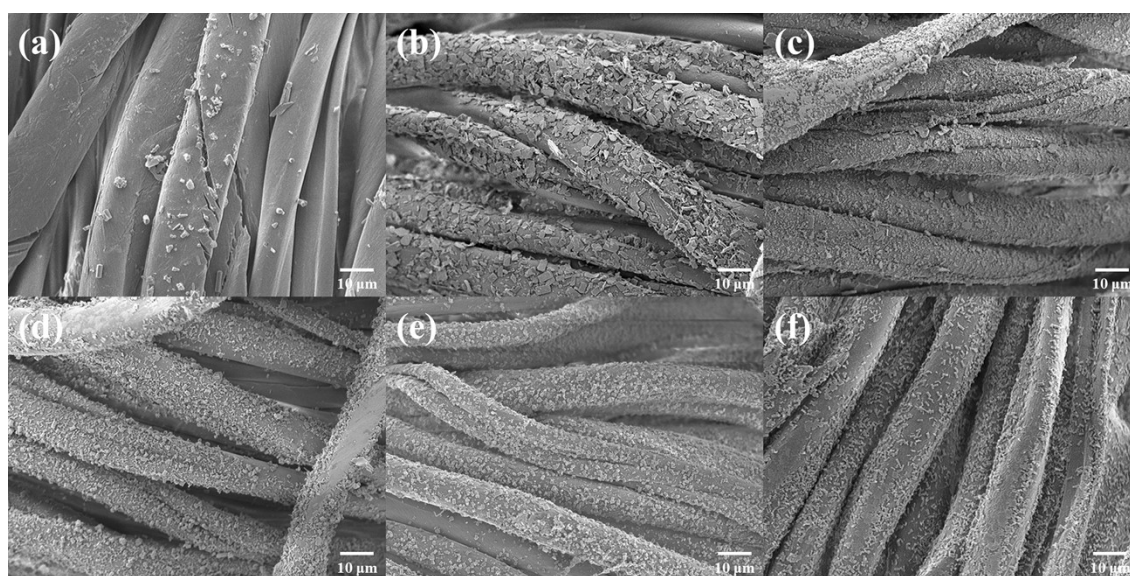

**Fig. S3** SEM images of (a) CAU-17\_ST@CF, (b) CAU-17\_0@CF, (c) CAU-17\_50@CF, (d) CAU-17\_100@CF, (e) CAU-17\_150@CF, and (f) CAU-17\_200@CF.

**Table. S1** Atomic percent of element obtained from XPS spectrum of MOF@CCF composites.

| Sample         | Atomic percentage (%) |       |       |
|----------------|-----------------------|-------|-------|
|                | C 1s                  | O 1s  | Bi 4f |
| CAU-17_ST@CCF  | 52.79                 | 40.03 | 7.18  |
| CAU-17_0@CCF   | 54.29                 | 37.70 | 8.01  |
| CAU-17_50@CCF  | 54.83                 | 38.29 | 6.88  |
| CAU17_100@CCF  | 51.37                 | 42.01 | 6.62  |
| CAU-17_150@CCF | 52.14                 | 41.40 | 6.46  |

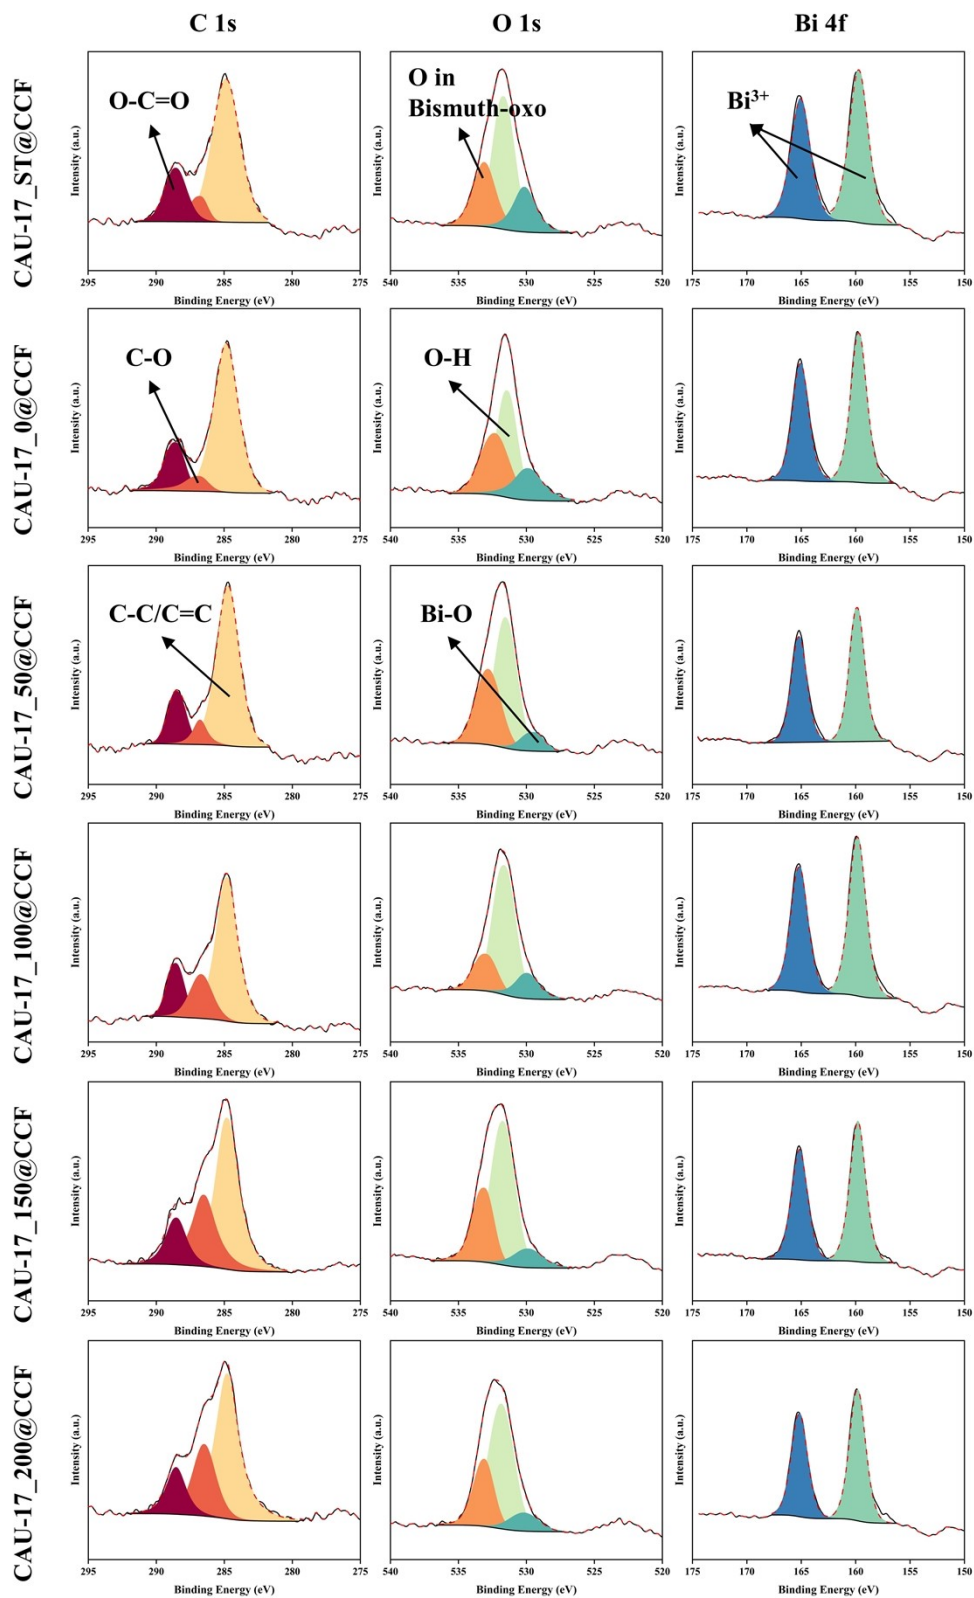

**Fig. S4** XPS high-resolution spectra of MOF@CCF composites.

**Table. S2** The photocatalysis performance results of samples.

| Samples        | Eg (eV) | K (min <sup>-1</sup> )  | R <sup>2</sup> |
|----------------|---------|-------------------------|----------------|
| Blank RhB      | -       | 2.5379*10 <sup>-5</sup> | 0.9054         |
| CCF            | -       | 5.1195*10 <sup>-5</sup> | 0.7929         |
| CAU-17_0@CCF   | 3.85    | 0.0012                  | 0.9303         |
| CAU-17_50@CCF  | 3.48    | 0.0059                  | 0.9695         |
| CAU-17_100@CCF | 3.03    | 0.0151                  | 0.9903         |
| CAU-17_150@CCF | 2.96    | 0.0242                  | 0.9980         |
| CAU-17_200@CCF | 2.92    | 0.0158                  | 0.9938         |
| CAU-17_ST@CCF  | 3.58    | 4.5699*10 <sup>-4</sup> | 0.8802         |
| CF             | -       | 3.7899*10 <sup>-5</sup> | 0.9707         |
| CAU-17_0@CCF   | 3.82    | 0.0013                  | 0.9805         |
| CAU-17_50@CCF  | 3.51    | 0.0025                  | 0.9863         |
| CAU-17_100@CCF | 3.36    | 0.0026                  | 0.9861         |
| CAU-17_150@CCF | 3.32    | 0.0042                  | 0.9914         |
| CAU-17_200@CCF | 3.17    | 0.0025                  | 0.9863         |
| CAU-17_ST@CCF  | 3.36    | 1.7359*10 <sup>-4</sup> | 0.1814         |

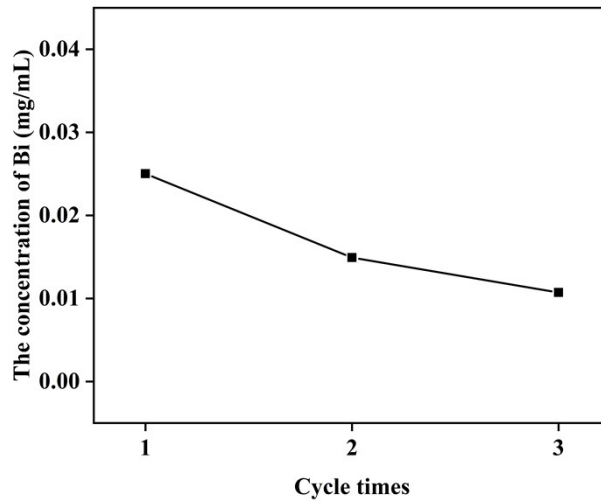

**Fig. S5** The concentration of Bi in solution after each cycle of photodegradation reaction.

**Table. S3** Comparison of RhB photodegradation performance with other cotton fabric composite photocatalytic materials

| <b>Photocatalyst</b>                                             | <b>Time (min)</b> | <b>Photocatalytic Efficiency (%)</b> | <b>References</b>            |
|------------------------------------------------------------------|-------------------|--------------------------------------|------------------------------|
| MIL-100(Fe)@cotton                                               | 660               | 96                                   | Lee et. al <sup>3</sup>      |
| ST-400 composite                                                 | 120               | 94                                   | Landi et. al <sup>4</sup>    |
| Cotton/PDA/Ag/AgCl                                               | 180               | 95                                   | Ding et. al <sup>5</sup>     |
| Ag <sub>3</sub> VO <sub>4</sub> @MIL-125-NH <sub>2</sub> @Cotton | 160               | 92                                   | Emam et. al <sup>6</sup>     |
| WCF/BWO-1.5                                                      | 180               | 93.73                                | Qin et. al <sup>7</sup>      |
| ZnO/BiOBr coated cotton fabrics                                  | 240               | 96.4                                 | Yang et. al <sup>8</sup>     |
| Cot-Ag@AgBr                                                      | 480               | 98                                   | Wang et. al <sup>9</sup>     |
| TiO <sub>2</sub> -coated cotton fabric                           | 70                | 73                                   | Özdemir et. al <sup>10</sup> |
| <b>CAU-17_150@CCF</b>                                            | <b>180</b>        | <b>98.77</b>                         | <b>This work</b>             |

## References

- 1 J. Zhao, D. T. Lee, R. W. Yaga, M. G. Hall, H. F. Barton, I. R. Woodward, C. J. Oldham, H. J. Walls, G. W. Peterson and G. N. Parsons, *Angew. Chem. Int. Ed.*, 2016, **55**, 13224–13228.
- 2 G. W. Peterson, A. X. Lu and T. H. I. Epps, *ACS Appl. Mater. Interfaces*, 2017, **9**, 32248–32254.
- 3 S. Lee, S. Ahn, H. Lee and J. Kim, *RSC Adv.*, 2022, **12**, 17505–17513.
- 4 S. Landi, J. Carneiro, S. Ferdov, A. M. Fonseca, I. C. Neves, M. Ferreira, P. Parpot, O. S. G. P. Soares and M. F. R. Pereira, *J. Photochem. Photobiol. Chem.*, 2017, **346**, 60–69.
- 5 K. Ding, W. Wang, D. Yu, W. Wang, P. Gao and B. Liu, *Appl. Surf. Sci.*, 2018, **454**, 101–111.
- 6 H. E. Emam, H. B. Ahmed, E. Gomaa, M. H. Helal and R. M. Abdelhameed, *Cellulose*, 2020, **27**, 7139–7155.
- 7 Q. Qin, R. Guo, S. Lin, S. Jiang, J. Lan, X. Lai, C. Cui, H. Xiao and Y. Zhang, *Cellulose*, 2019, **26**, 3909–3922.
- 8 H. Yang, Q. Zhang, Y. Chen, Y. Huang, F. Yang and Z. Lu, *Carbohydr. Polym.*, 2018, **201**, 162–171.
- 9 M. Wang, M. Zhang, Q. Gao, Y. Liu, M. Zhang, R. Shen, Y. Zhang, J. Hu and G. Wu, *Cellulose*, 2020, **27**, 10047–10060.
- 10 A. O. Özdemir, B. Caglar, O. Çubuk, F. Coldur, M. Kuzucu, E. K. Guner, B. Doğan, S. Caglar and K. V. Özdokur, *Mater. Chem. Phys.*, 2022, **287**, 126342.
